# Supplementary figures and images for: A catenane consisting of a large ring threaded through both cyclic units of a handcuff-like compound
Source: Royal Society of Chemistry journal article supplement (doi:10.1039/b509745b), 2005-01-01

Supporting material. A numbered figure of the molecules **3**, **5<sup>2+</sup>** and **1<sup>2+</sup>**.

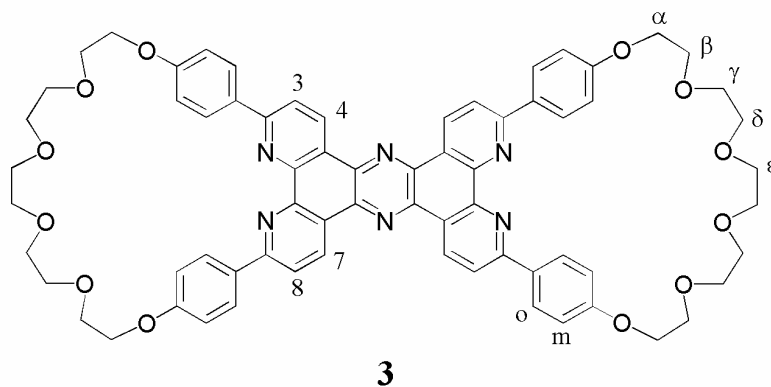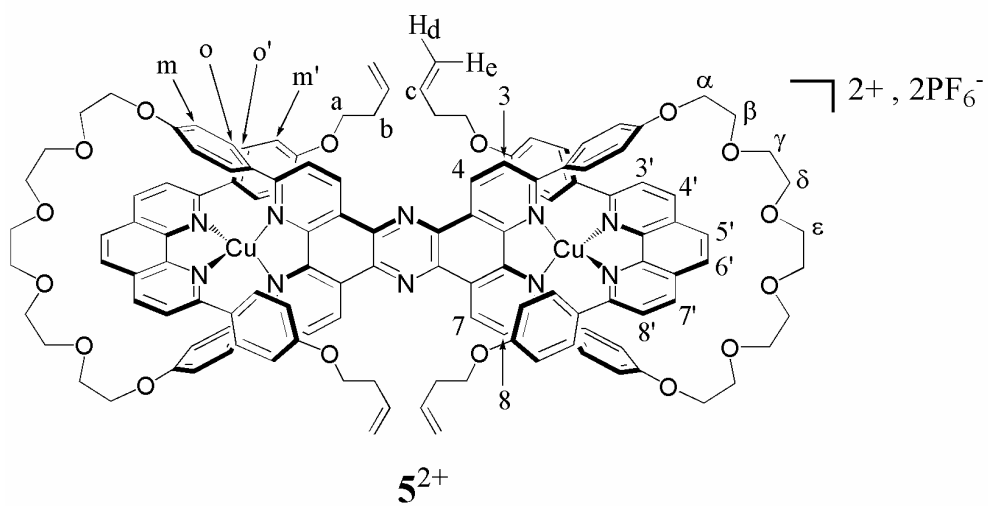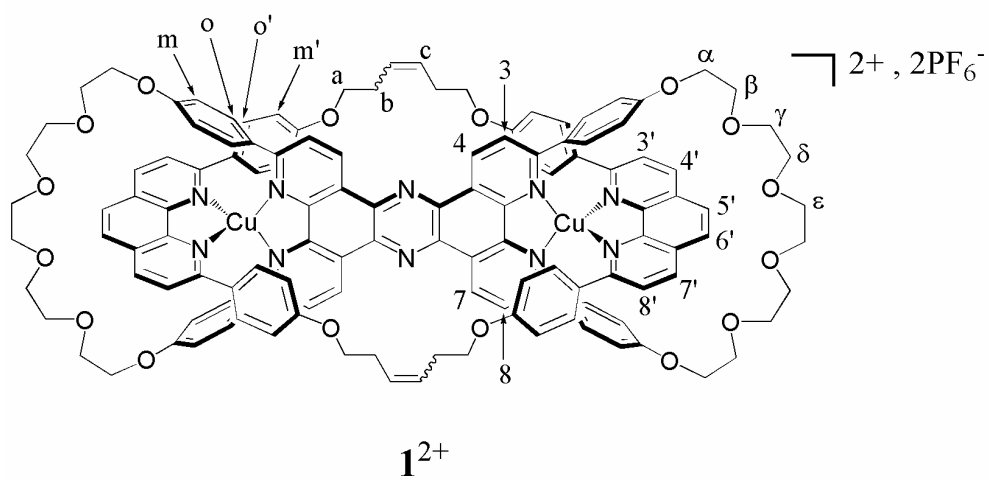

Supplement: b509745b.pdf [file b509745b.pdf]
